# Supplementary material for: Efficiencies and mechanisms of the chemical cleaning of fouled polytetrafluoroethylene (PTFE) membranes during the microfiltration of alkali/surfactant/polymer flooding oilfield wastewater
Source: Royal Society of Chemistry journal article supplement (doi:10.1039/c9ra06745k), 2019-01-01
Supplement: c9ra06745k1.pdf [file c9ra06745k1.pdf]

Supporting Information for  
Efficiencies and mechanisms of chemical cleaning of fouled  
polytetrafluoroethylene (PTFE) membrane during microfiltration of  
alkali/surfactant/polymer flooding oilfield wastewater

Bing Zhang,<sup>\*abc</sup> Shuili Yu,<sup>d</sup> Youbing Zhu,<sup>d</sup> Yu Shen,<sup>ab</sup> Xu Gao,<sup>ab</sup> Wenxin Shi,<sup>\*e</sup> and Joo Hwa Tay<sup>c</sup>

<sup>a</sup> *National Base of International Science and Technology Cooperation for Intelligent Manufacturing Service, Chongqing Key Laboratory of Catalysis & New Environmental Materials, Chongqing Technology and Business University, Chongqing 400067, China*

<sup>b</sup> *Chongqing South-to-Thais Environmental Protection Technology Research Institute Co., Ltd., Chongqing 400067, China*

<sup>c</sup> *Department of Civil Engineering, University of Calgary, Calgary T2N 1N4, Canada*

<sup>d</sup> *School of Environmental Science and Engineering, State Key Laboratory of Pollution Control and Resource Reuse, Tongji University, Shanghai 200092, China*

<sup>e</sup> *School of Environmental and Ecology, Chongqing University, Chongqing 400044, China*

---

\* Corresponding author: E-mail: [hitzhangbing@163.com](mailto:hitzhangbing@163.com) (Bing Zhang); [swx@hit.edu.cn](mailto:swx@hit.edu.cn) (Wenxin Shi).

**Table**

Table S1 Composition of the raw wastewater.

Table S2 EDX analysis of various PTFE membranes.

**Table S1** Composition of the raw wastewater.

| Component                                  | Concentration (mg/L) |
|--------------------------------------------|----------------------|
| Median particle diameter ( $\mu\text{m}$ ) | $5.59 \pm 1.13$      |
| Crude oil                                  | $6.64 \pm 2.29$      |
| SS                                         | $83 \pm 17$          |
| COD                                        | $1083 \pm 65$        |
| APAM                                       | $749 \pm 33$         |
| Surfactant                                 | $37 \pm 5$           |
| Turbidity                                  | $16.4 \pm 0.4$       |
| Carbonate                                  | $1925 \pm 80$        |
| Bicarbonate                                | $2890 \pm 130$       |
| TDS                                        | $5984 \pm 450$       |

**Table S2** EDX analysis of various PTFE membranes.

| Element | Original membrane | Fouled membrane | After NaClO+NaOH cleaning | After HCl cleaning |
|---------|-------------------|-----------------|---------------------------|--------------------|
| C       | 36.35             | 42.60           | 37.29                     | 36.44              |
| O       | 8.42              | 11.51           | 9.32                      | 8.53               |
| F       | 55.23             | 21.36           | 47.91                     | 54.83              |
| Cu      | 0.00              | 5.67            | 0.82                      | 0.00               |
| Na      | 0.00              | 0.89            | 0.00                      | 0.00               |
| Mg      | 0.00              | 0.25            | 0.17                      | 0.09               |
| Si      | 0.00              | 8.12            | 1.38                      | 0.00               |
| Cl      | 0.00              | 0.58            | 0.00                      | 0.00               |
| K       | 0.00              | 0.59            | 0.00                      | 0.00               |
| Ca      | 0.00              | 1.41            | 0.95                      | 0.05               |
| Fe      | 0.00              | 7.02            | 2.16                      | 0.06               |
